# Supplementary material for: Context-dependent genetic architecture of Drosophila life span
Source: PLoS Biol. 2020 Mar 5;18(3):e3000645. doi: 10.1371/journal.pbio.3000645 (PMC7077879; doi:10.1371/journal.pbio.3000645)
Supplement: S8 Table — (A) Summary statistics of line means and standard errors (SEs) in each RNAi and control genotype. (B–P) Full-model and reduced-model ANOVAs for each gene. (Q) Summary of P values. (XLSX) [file pbio.3000645.s008.xlsx]

## Sheet: A. RNAi Line Means
Genotype	Females, 18oC (SE)	Males, 18oC (SE)	Females, 25oC (SE)	Males, 25oC (SE)	Females, 28oC (SE)	Males, 28oC (SE)
Control	135.43 (2.08)	140.86 (3.07)	55.86 (2.22)	52.81 (2.32)	40.82 (1.40)	52.1 (1.22)
bru-3 RNAi	124.5 (3.63)	118.17 (4.17)	53.57 (2.22)	53.3 (2.06)	41.38 (1.47)	49.53 (1.36)
CG11828 RNAi	118.86 (3.07)	125.4 (3.70)	58.5 (2.09)	53.26 (2.15)	44.94 (1.61)	46.98 (1.36)
CG13921 RNAi	133.2 (4.11)	137.93 (4.47)	52.94 (2.54)	61.73 (2.33)	37.37 (1.70)	51.68 (1.00)
CG42750 RNAi	115.02 (3.13)	126.23 (4.28)	48.44 (2.12)	55.28 (1.96)	40.77 (1.44)	53.52 (1.03)
CG9265 RNAi	125.15 (2.1)	133.04 (3.12)	61.02 (1.99)	52.26 (1.99)	42.57 (1.49)	41.03 (1.55)
Cht-2 RNAi	115.95 (3.3)	127.03 (3.75)	65.29 (1.54)	60.64 (1.06)	36.92 (1.5)	42.73 (1.43)
Cka RNAi	123.69 (2.82)	127.15 (3.57)	58.99 (2.12)	56.17 (1.78)	47.9 (1.15)	42.25 (1.23)
Doa RNAi	140.08 (3.01)	161.17 (3.43)	61.66 (1.97)	58.91 (2.20)	39.56 (1.39)	39.21 (1.14)
E23 RNAi	120 (3.43)	122.27 (2.89)	67.38 (1.84)	65.5 (1.66)	43.91 (1.21)	45.91 (0.89)
Eip75B RNAi	158.58 (4.9)	153.78 (6.05)	56.85 (2.46)	61.28 (1.87)	47.59 (1.11)	49.98 (1.07)
olf413 RNAi	114.6 (3.28)	128.51 (3.87)	62.98 (1.36)	58.37 (1.45)	32.61 (1.72)	30.13 (1.85)
PGRP-LA RNAi	128.76 (2.56)	138.72 (2.57)	65.66 (1.89)	64.48 (1.41)	43.02 (1.49)	40.73 (1.71)
PGRP-LC RNAi	116.03 (3.14)	128.84 (3.98)	51.22 (2.39)	56.41 (2.34)	32.3 (1.44)	31.16 (1.81)
Rdl RNAi	139.29 (2.29)	135.51 (3.91)	65.14 (1.62)	69.68 (1.64)	47.77 (1.12)	53.16 (0.86)
tou RNAi	129.76 (3.68)	126.79 (4.04)	51.47 (2.29)	60.15 (1.67)	38.25 (1.46)	44.94 (0.98)

## Sheet: B. bru3
Analysis	Source of Variation	df	SS	MS	F-value	P-value
bru-3	Sex	1	1787.9	1787.9	2.18	0.1412
Full Model	Temperature	2	1740209	870105	996.83	<0.0001
Pooled Across	Genotype	1	14421	14421	16.54	<0.0001
Temperature & Sex	Sex×Temperature	2	8776.82	4388.41	5.34	0.0054
Temperature = 18C, 25C, 28C	Sex×Genotype	1	1449.31	1449.31	1.77	0.1851
	Temperature×Genotype	2	21750	10875	12.46	<0.0001
	Sex×Temperature×Genotype	2	4395.11	2197.56	2.68	0.0709
	Rep(Temperature×Genotype)	260	229228	881.644	1.07	0.301
	Sex×Rep(Temperature×Genotype)	238	197089	828.105	1.5	<0.0001
	Error	833	459113	551.156
bru-3	Temperature	2	966448	483224	609.26	<0.0001
Females Pooled	Genotype	1	2717.13	2717.13	3.43	0.0652
Across Temperature	Temperature×Genotype	2	3727.98	1863.99	2.35	0.0974
Temperature = 18C, 25C, 28C	Rep(Temperature×Genotype)	248	199449	804.231	1.68	<0.0001
	Error	425	203783	479.49
bru-3	Temperature	2	838189	419094	467.6	<0.0001
Males Pooled	Genotype	1	11644	11644	13	0.0004
Across Temperature	Temperature×Genotype	2	18963	9481.52	10.58	<0.0001
Temperature = 18C, 25C, 28C	Rep(Temperature×Genotype)	250	227061	908.246	1.45	0.0004
	Error	408	255330	625.809
bru-3	Sex	1	132.899	132.899	0.1	0.7574
Sex Pooled	Genotype	1	36622	36622	20.23	<0.0001
Within Temperature	Sex×Genotype	1	5433.82	5433.82	3.93	0.0508
Temperature = 18C	Rep(Genotype)	84	154133	1834.92	1.32	0.1046
	Sex×Rep(Genotype)	82	114306	1393.98	1.5	0.0085
	Error	284	264335	930.755
bru-3	Sex	1	440.084	440.084	0.53	0.4684
Sex Pooled	Genotype	1	110.003	110.003	0.18	0.6723
Within Temperature	Sex×Genotype	1	306.684	306.684	0.37	0.5448
Temperature = 25C	Rep(Genotype)	89	54479	612.124	0.73	0.9255
	Sex×Rep(Genotype)	86	71844	835.399	1.69	0.0007
	Error	307	151663	494.018
bru-3	Sex	1	9153.64	9153.64	58.42	<0.0001
Sex Pooled	Genotype	1	79.1093	79.1093	0.34	0.5621
Within Temperature	Sex×Genotype	1	98.3714	98.3714	0.63	0.4307
Temperature = 28C	Rep(Genotype)	87	20615	236.954	1.51	0.0351
	Sex×Rep(Genotype)	70	10938	156.264	0.88	0.7384
	Error	242	43115	178.163
bru-3	Genotype	1	6314.69	6314.69	4.34	0.0402
Female	Rep(Genotype)	83	122925	1481.03	2.36	<0.0001
Temperature = 18C	Error	144	90425	627.954
bru-3	Genotype	1	324.339	324.339	0.48	0.4909
Female	Rep(Genotype)	87	59249	681.022	1.22	0.1446
Temperature = 25C	Error	159	89087	560.294
bru-3	Genotype	1	27.3908	27.3908	0.12	0.7255
Female	Rep(Genotype)	78	17275	221.474	1.11	0.295
Temperature = 28C	Error	122	24271	198.944
bru-3	Genotype	1	30363	30363	17.62	<0.0001
Male	Rep(Genotype)	83	144712	1743.51	1.4	0.0388
Temperature = 18C	Error	140	173909	1242.21
bru-3	Genotype	1	22.4536	22.4536	0.03	0.8642
Male	Rep(Genotype)	88	68338	776.572	1.84	0.0006
Temperature = 25C	Error	148	62577	422.816
bru-3	Genotype	1	327.098	327.098	1.85	0.1769
Male	Rep(Genotype)	79	14011	177.36	1.13	0.2713
Temperature = 28C	Error	120	18844	157.035

## Sheet: C. CG11828
Analysis	Source of Variation	df	SS	MS	F-value	P-value
CG11828	Sex	1	1553.09	1553.09	2.19	0.1398
Full Model	Temperature	2	1804491	902245	1027.71	<0.0001
Pooled Across	Genotype	1	9593.14	9593.14	10.94	0.0011
Temperature & Sex	Sex×Temperature	2	8510.71	4255.35	6.01	0.0028
Temperature = 18C, 25C, 28C	Sex×Genotype	1	1798.35	1798.35	2.54	0.1122
	Temperature×Genotype	2	21150	10575	12.05	<0.0001
	Sex×Temperature×Genotype	2	1200.07	600.035	0.85	0.4298
	Rep(Temperature×Genotype)	267	237227	888.49	1.25	0.0376
	Sex×Rep(Temperature×Genotype)	245	174650	712.859	1.44	0.0001
	Error	852	421458	494.669
CG11828	Temperature	2	880186	440093	646.19	<0.0001
Females Pooled	Genotype	1	1603.76	1603.76	2.36	0.1259
Across Temperature	Temperature×Genotype	2	14524	7261.83	10.66	<0.0001
Temperature = 18C, 25C, 28C	Rep(Temperature×Genotype)	257	177184	689.433	1.5	<0.0001
	Error	438	200774	458.388
CG11828	Temperature	2	955179	477589	521.33	<0.0001
Males Pooled	Genotype	1	8793.56	8793.56	9.6	0.0022
Across Temperature	Temperature×Genotype	2	7888.64	3944.32	4.31	0.0144
Temperature = 18C, 25C, 28C	Rep(Temperature×Genotype)	255	237583	931.7	1.75	<0.0001
	Error	414	220684	533.054
CG11828	Sex	1	3169.41	3169.41	2.53	0.1157
Sex Pooled	Genotype	1	30322	30322	20.11	<0.0001
Within Temperature	Sex×Genotype	1	38.3586	38.3586	0.03	0.8616
Temperature = 18C	Rep(Genotype)	86	131202	1525.61	1.21	0.1948
	Sex×Rep(Genotype)	84	106277	1265.2	1.58	0.0031
	Error	287	230007	801.417
CG11828	Sex	1	2850.53	2850.53	4.63	0.0342
Sex Pooled	Genotype	1	268.352	268.352	0.29	0.5912
Within Temperature	Sex×Genotype	1	219.013	219.013	0.36	0.5526
Temperature = 25C	Rep(Genotype)	91	84967	933.701	1.51	0.0269
	Sex×Rep(Genotype)	87	53848	618.938	1.37	0.0285
	Error	310	140347	452.733
CG11828	Sex	1	3583.62	3583.62	18.25	<0.0001
Sex Pooled	Genotype	1	147.944	147.944	0.64	0.427
Within Temperature	Sex×Genotype	1	2506.86	2506.86	12.77	0.0006
Temperature = 28C	Rep(Genotype)	90	21058	233.975	1.19	0.2158
	Sex×Rep(Genotype)	74	14526	196.295	0.98	0.5304
	Error	255	51104	200.409
CG11828	Genotype	1	14816	14816	14.28	0.0003
Female	Rep(Genotype)	86	90570	1053.14	1.71	0.0022
Temperature = 18C	Error	146	90074	616.944
CG11828	Genotype	1	474.279	474.279	0.62	0.4335
Female	Rep(Genotype)	89	68801	773.05	1.62	0.0038
Temperature = 25C	Error	167	79639	476.881
CG11828	Genotype	1	888.322	888.322	4.07	0.0467
Female	Rep(Genotype)	82	17813	217.231	0.87	0.7422
Temperature = 28C	Error	125	31061	248.488
CG11828	Genotype	1	14889	14889	8.65	0.0042
Male	Rep(Genotype)	84	147248	1752.96	1.77	0.0014
Temperature = 18C	Error	141	139933	992.431
CG11828	Genotype	1	0.706115	0.706115	0	0.9764
Male	Rep(Genotype)	89	72876	818.837	1.93	0.0002
Temperature = 25C	Error
CG11828	Genotype	1	1655.13	1655.13	7.86	0.0062
Male	Rep(Genotype)	82	17459	212.909	1.38	0.0499
Temperature = 28C	Error	130	20043	154.179

## Sheet: D. CG13921
Analysis	Source of Variation	df	SS	MS	F-value	P-value
CG13921	Sex	1	16125	16125	16.58	<0.0001
Full Model	Temperature	2	2067152	1033576	1046.28	<0.0001
Pooled Across	Genotype	1	298.944	298.944	0.3	0.5826
Temperature & Sex	Sex×Temperature	2	5470.43	2735.21	2.81	0.062
Temperature = 18C, 25C, 28C	Sex×Genotype	1	1986.88	1986.88	2.04	0.1541
	Temperature×Genotype	2	2514.1	1257.05	1.27	0.2818
	Sex×Temperature×Genotype	2	1728	863.998	0.89	0.4127
	Rep(Temperature×Genotype)	265	264735	999	1.02	0.449
	Sex×Rep(Temperature×Genotype)	248	243934	983.606	1.84	<0.0001
	Error	855	456685	534.135
CG13921	Temperature	2	1075034	537517	568.04	<0.0001
Females Pooled	Genotype	1	1990.47	1990.47	2.1	0.148
Across Temperature	Temperature×Genotype	2	47.4668	23.7334	0.03	0.9752
Temperature = 18C, 25C, 28C	Rep(Temperature×Genotype)	257	247439	962.798	1.87	<0.0001
	Error	433	222760	514.457
CG13921	Temperature	2	999919	499960	501.13	<0.0001
Males Pooled	Genotype	1	542.761	542.761	0.54	0.4614
Across Temperature	Temperature×Genotype	2	4931.62	2465.81	2.47	0.0864
Temperature = 18C, 25C, 28C	Rep(Temperature×Genotype)	256	260164	1016.27	1.83	<0.0001
	Error	422	233925	554.325
CG13921	Sex	1	5040.8	5040.8	2.59	0.1115
Sex Pooled	Genotype	1	1279.06	1279.06	0.67	0.4168
Within Temperature	Sex×Genotype	1	109.464	109.464	0.06	0.8132
Temperature = 18C	Rep(Genotype)	83	162170	1953.86	0.99	0.5244
	Sex×Rep(Genotype)	81	160455	1980.93	2.37	<0.0001
	Error	271	226355	835.258
CG13921	Sex	1	530.547	530.547	0.71	0.4021
Sex Pooled	Genotype	1	939.68	939.68	1.01	0.3167
Within Temperature	Sex×Genotype	1	3797.09	3797.09	5.07	0.0268
Temperature = 25C	Rep(Genotype)	89	83126	934.003	1.24	0.1562
	Sex×Rep(Genotype)	86	64648	751.716	1.32	0.0446
	Error	310	176048	567.896
CG13921	Sex	1	15028	15028	64.84	<0.0001
Sex Pooled	Genotype	1	507.506	507.506	2.43	0.1223
Within Temperature	Sex×Genotype	1	55.3456	55.3456	0.24	0.6264
Temperature = 28C	Rep(Genotype)	93	19438	209.015	0.9	0.6913
	Sex×Rep(Genotype)	81	18832	232.49	1.17	0.174
	Error	274	54282	198.111
CG13921	Genotype	1	916.061	916.061	0.54	0.4654
Female	Rep(Genotype)	83	145159	1748.91	2.79	<0.0001
Temperature = 18C	Error	137	85837	626.546
CG13921	Genotype	1	509.498	509.498	0.58	0.45
Female	Rep(Genotype)	88	78481	891.826	1.43	0.0253
Temperature = 25C	Error	162	101011	623.527
CG13921	Genotype	1	588.019	588.019	2.13	0.1481
Female	Rep(Genotype)	86	23799	276.735	1.03	0.4293
Temperature = 28C	Error	134	35911	267.996
CG13921	Genotype	1	677.473	677.473	0.33	0.5698
Male	Rep(Genotype)	81	172686	2131.93	2.03	0.0001
Temperature = 18C	Error	134	140518	1048.64
CG13921	Genotype	1	4938.37	4938.37	5.93	0.0168
Male	Rep(Genotype)	87	73473	844.522	1.67	0.0032
Temperature = 25C	Error	148	75036	507.002
CG13921	Genotype	1	1.97046	1.97046	0.01	0.9113
Male	Rep(Genotype)	88	14004	159.14	1.21	0.1535
Temperature = 28C	Error	140	18371	131.22

## Sheet: E. CG42750
Analysis	Source of Variation	df	SS	MS	F-value	P-value
CG42750	Sex	1	17770	17770	25.26	<0.0001
Full Model	Temperature	2	1752333	876167	942.11	<0.0001
Pooled Across	Genotype	1	14825	14825	15.95	<0.0001
Temperature & Sex	Sex×Temperature	2	6575.72	3287.86	4.67	0.0102
Temperature = 18C, 25C, 28C	Sex×Genotype	1	2579.92	2579.92	3.67	0.0566
	Temperature×Genotype	2	21885	10942	11.77	<0.0001
	Sex×Temperature×Genotype	2	1145.27	572.636	0.81	0.4443
	Rep(Temperature×Genotype)	265	249673	942.164	1.33	0.0115
	Sex×Rep(Temperature×Genotype)	247	175082	708.836	1.46	<0.0001
	Error	868	421410	485.496
CG42750	Temperature	2	886048	443024	616.35	<0.0001
Females Pooled	Genotype	1	15367	15367	21.4	<0.0001
Across Temperature	Temperature×Genotype	2	10901	5450.27	7.58	0.0006
Temperature = 18C, 25C, 28C	Rep(Temperature×Genotype)	258	188659	731.235	1.83	<0.0001
	Error	442	176423	399.147
CG42750	Temperature	2	901761	450881	495.37	<0.0001
Males Pooled	Genotype	1	2077.96	2077.96	2.28	0.1319
Across Temperature	Temperature×Genotype	2	11166	5582.77	6.13	0.0025
Temperature = 18C, 25C, 28C	Rep(Temperature×Genotype)	254	234670	923.899	1.61	<0.0001
	Error	426	244987	575.088
CG42750	Sex	1	6135.55	6135.55	5.2	0.0251
Sex Pooled	Genotype	1	34974	34974	19.7	<0.0001
Within Temperature	Sex×Genotype	1	301.169	301.169	0.26	0.6147
Temperature = 18C	Rep(Genotype)	83	149726	1803.93	1.52	0.0299
	Sex×Rep(Genotype)	82	97555	1189.69	1.43	0.0176
	Error	272	225967	830.762
CG42750	Sex	1	418.646	418.646	0.58	0.4479
Sex Pooled	Genotype	1	813.485	813.485	0.94	0.334
Within Temperature	Sex×Genotype	1	3589.18	3589.18	4.98	0.0281
Temperature = 25C	Rep(Genotype)	91	79178	870.089	1.2	0.1939
	Sex×Rep(Genotype)	89	64544	725.213	1.59	0.0019
	Error	325	147861	454.958
CG42750	Sex	1	15942	15942	93.28	<0.0001
Sex Pooled	Genotype	1	55.5834	55.5834	0.25	0.6215
Within Temperature	Sex×Genotype	1	185.689	185.689	1.09	0.3005
Temperature = 28C	Rep(Genotype)	91	20769	228.233	1.34	0.0968
	Sex×Rep(Genotype)	76	12984	170.839	0.97	0.5454
	Error	271	47582	175.579
CG42750	Genotype	1	21862	21862	19.55	<0.0001
Female	Rep(Genotype)	83	95236	1147.42	2.51	<0.0001
Temperature = 18C	Error	135	61754	457.436
CG42750	Genotype	1	3808.37	3808.37	4.8	0.031
Female	Rep(Genotype)	90	72035	800.394	1.59	0.005
Temperature = 25C	Error	169	85036	503.169
CG42750	Genotype	1	10.709	10.709	0.04	0.8366
Female	Rep(Genotype)	85	21387	251.614	1.17	0.203
Temperature = 28C	Error	138	29634	214.738
CG42750	Genotype	1	12296	12296	6.88	0.0103
Male	Rep(Genotype)	82	148838	1815.1	1.51	0.0161
Temperature = 18C	Error	137	164213	1198.64
CG42750	Genotype	1	477.125	477.125	0.59	0.4426
Male	Rep(Genotype)	90	73521	816.895	2.03	<0.0001
Temperature = 25C	Error	156	62826	402.73
CG42750	Genotype	1	167.696	167.696	1.12	0.2926
Male	Rep(Genotype)	82	12311	150.14	1.11	0.2899
Temperature = 28C	Error	133	17948	134.949

## Sheet: F. CG9265
Analysis	Source of Variation	df	SS	MS	F-value	P-value
CG9265	Sex	1	1514.86	1514.86	2.3	0.1304
Full Model	Temperature	2	2099489	1049744	1184.03	<0.0001
Pooled Across	Genotype	1	5684.2	5684.2	6.41	0.0119
Temperature & Sex	Sex×Temperature	2	11485	5742.63	8.73	0.0002
Temperature = 18C, 25C, 28C	Sex×Genotype	1	2059.45	2059.45	3.13	0.0781
	Temperature×Genotype	2	7815.11	3907.55	4.41	0.0131
	Sex×Temperature×Genotype	2	2505.8	1252.9	1.9	0.1511
	Rep(Temperature×Genotype)	270	242618	898.585	1.36	0.0071
	Sex×Rep(Temperature×Genotype)	254	168558	663.615	1.7	<0.0001
	Error	892	348052	390.192
CG9265	Temperature	2	992765	496382	829.66	<0.0001
Females Pooled	Genotype	1	447.298	447.298	0.75	0.3879
Across Temperature	Temperature×Genotype	2	6997.04	3498.52	5.85	0.0033
Temperature = 18C, 25C, 28C	Rep(Temperature×Genotype)	264	160411	607.617	1.77	<0.0001
	Error	453	155746	343.811
CG9265	Temperature	2	1136095	568047	603.79	<0.0001
Males Pooled	Genotype	1	6930.38	6930.38	7.37	0.0071
Across Temperature	Temperature×Genotype	2	3967.94	1983.97	2.11	0.1234
Temperature = 18C, 25C, 28C	Rep(Temperature×Genotype)	260	249468	959.494	2.19	<0.0001
	Error	439	192305	438.053
CG9265	Sex	1	5308.31	5308.31	4.79	0.0312
Sex Pooled	Genotype	1	10115	10115	6.48	0.0126
Within Temperature	Sex×Genotype	1	89.0548	89.0548	0.08	0.7774
Temperature = 18C	Rep(Genotype)	87	137874	1584.75	1.42	0.0534
	Sex×Rep(Genotype)	86	96312	1119.91	2.2	<0.0001
	Error	293	149441	510.037
CG9265	Sex	1	4218.87	4218.87	6.93	0.01
Sex Pooled	Genotype	1	512.095	512.095	0.61	0.4372
Within Temperature	Sex×Genotype	1	700.251	700.251	1.15	0.2863
Temperature = 25C	Rep(Genotype)	91	77417	850.738	1.39	0.0602
	Sex×Rep(Genotype)	86	52577	611.36	1.41	0.0187
	Error	310	134517	433.926
CG9265	Sex	1	3274.85	3274.85	13.67	0.0004
Sex Pooled	Genotype	1	2626.18	2626.18	8.9	0.0036
Within Temperature	Sex×Genotype	1	3674.67	3674.67	15.34	0.0002
Temperature = 28C	Rep(Genotype)	92	27327	297.033	1.24	0.1624
	Sex×Rep(Genotype)	82	19669	239.867	1.08	0.3161
	Error	289	64094	221.778
CG9265	Genotype	1	6071.4	6071.4	7.2	0.0087
Female	Rep(Genotype)	87	75117	863.409	2.85	<0.0001
Temperature = 18C	Error	146	44272	303.232
CG9265	Genotype	1	1219.61	1219.61	1.75	0.1894
Female	Rep(Genotype)	89	62675	704.21	1.5	0.0131
Temperature = 25C	Error	161	75519	469.06
CG9265	Genotype	1	67.1121	67.1121	0.26	0.6103
Female	Rep(Genotype)	88	22620	257.042	1.04	0.4052
Temperature = 28C	Error	146	35956	246.273
CG9265	Genotype	1	4176.9	4176.9	2.33	0.1305
Male	Rep(Genotype)	86	157768	1834.51	2.56	<0.0001
Temperature = 18C	Error	147	105169	715.435
CG9265	Genotype	1	5.05529	5.05529	0.01	0.9352
Male	Rep(Genotype)	88	68039	773.172	1.95	0.0002
Temperature = 25C	Error	149	58998	395.962
CG9265	Genotype	1	6577.88	6577.88	24.15	<0.0001
Male	Rep(Genotype)	86	23662	275.137	1.4	0.0384
Temperature = 28C	Error	143	28138	196.769

## Sheet: G. Cht2
Analysis	Source of Variation	df	SS	MS	F-value	P-value
Cht-2	Sex	1	6606.29	6606.29	10.58	0.0013
Full Model	Temperature	2	1833118	916559	1090.07	<0.0001
Pooled Across	Genotype	1	9139.19	9139.19	10.87	0.0011
Temperature & Sex	Sex×Temperature	2	12446	6222.98	9.96	<0.0001
Temperature = 18C, 25C, 28C	Sex×Genotype	1	6.51075	6.51075	0.01	0.9187
	Temperature×Genotype	2	37640	18820	22.38	<0.0001
	Sex×Temperature×Genotype	2	1536.6	768.301	1.23	0.2939
	Rep(Temperature×Genotype)	268	228116	851.179	1.36	0.0069
	Sex×Rep(Temperature×Genotype)	253	158952	628.269	1.38	0.0005
	Error	879	400647	455.798
Cht-2	Temperature	2	871211	435605	641.06	<0.0001
Females Pooled	Genotype	1	4004.11	4004.11	5.9	0.0158
Across Temperature	Temperature×Genotype	2	23884	11942	17.57	<0.0001
Temperature = 18C, 25C, 28C	Rep(Temperature×Genotype)	261	180272	690.696	1.8	<0.0001
	Error	444	170485	383.976
Cht-2	Temperature	2	990332	495166	623.68	<0.0001
Males Pooled	Genotype	1	4921.22	4921.22	6.2	0.0134
Across Temperature	Temperature×Genotype	2	15892	7945.91	10.01	<0.0001
Temperature = 18C, 25C, 28C	Rep(Temperature×Genotype)	260	209083	804.164	1.52	<0.0001
	Error	435	230162	529.107
Cht-2	Sex	1	8190.25	8190.25	7.23	0.0086
Sex Pooled	Genotype	1	32080	32080	18.65	<0.0001
Within Temperature	Sex×Genotype	1	788.528	788.528	0.7	0.4065
Temperature = 18C	Rep(Genotype)	86	150105	1745.41	1.53	0.0252
	Sex×Rep(Genotype)	85	96998	1141.16	1.35	0.0352
	Error	283	238394	842.382
Cht-2	Sex	1	1945.63	1945.63	4.11	0.0456
Sex Pooled	Genotype	1	8244.56	8244.56	13.7	0.0004
Within Temperature	Sex×Genotype	1	25.1271	25.1271	0.05	0.8183
Temperature = 25C	Rep(Genotype)	90	54600	606.664	1.28	0.1265
	Sex×Rep(Genotype)	88	41870	475.795	1.42	0.015
	Error	317	105948	334.219
Cht-2	Sex	1	7954.78	7954.78	31.79	<0.0001
Sex Pooled	Genotype	1	4947.59	4947.59	19.54	<0.0001
Within Temperature	Sex×Genotype	1	726.707	726.707	2.9	0.0921
Temperature = 28C	Rep(Genotype)	92	23411	254.468	1.02	0.471
	Sex×Rep(Genotype)	80	20084	251.046	1.24	0.1016
	Error	279	56305	201.811
Cht-2	Genotype	1	20929	20929	17.4	<0.0001
Female	Rep(Genotype)	86	105902	1231.42	2.28	<0.0001
Temperature = 18C	Error	138	74505	539.889
Cht-2	Genotype	1	5079.46	5079.46	9.17	0.0032
Female	Rep(Genotype)	89	49619	557.518	1.4	0.0306
Temperature = 25C	Error	166	65871	396.815
Cht-2	Genotype	1	813.12	813.12	2.85	0.0946
Female	Rep(Genotype)	86	24750	287.794	1.34	0.0629
Temperature = 28C	Error	140	30109	215.065
Cht-2	Genotype	1	12292	12292	7.47	0.0076
Male	Rep(Genotype)	85	141544	1665.23	1.47	0.0204
Temperature = 18C	Error	145	163889	1130.27
Cht-2	Genotype	1	3539.47	3539.47	6.6	0.0118
Male	Rep(Genotype)	89	48616	546.253	2.06	<0.0001
Temperature = 25C	Error	151	40076	265.405
Cht-2	Genotype	1	4576.34	4576.34	20.91	<0.0001
Male	Rep(Genotype)	86	18922	220.023	1.17	0.2073
Temperature = 28C	Error	139	26196	188.46

## Sheet: H. Cka
Analysis	Source of Variation	df	SS	MS	F-value	P-value
Cka	Sex	1	981.528	981.528	1.36	0.2447
Full Model	Temperature	2	1916261	958130	1219.55	<0.0001
Pooled Across	Genotype	1	4702.87	4702.87	5.99	0.015
Temperature & Sex	Sex×Temperature	2	4729.12	2364.56	3.27	0.0395
Temperature = 18C, 25C, 28C	Sex×Genotype	1	2715.18	2715.18	3.76	0.0536
	Temperature×Genotype	2	16379	8189.27	10.42	<0.0001
	Sex×Temperature×Genotype	2	5071.58	2535.79	3.51	0.0313
	Rep(Temperature×Genotype)	266	211069	793.494	1.09	0.2363
	Sex×Rep(Temperature×Genotype)	248	180414	727.475	1.6	<0.0001
	Error	877	398828	454.764
v	v	v	v	v	v	v
Cka	Temperature	2	923520	461760	723.26	<0.0001
Females Pooled	Genotype	1	40.5778	40.5778	0.06	0.8011
Across Temperature	Temperature×Genotype	2	11342	5670.97	8.88	0.0002
Temperature = 18C, 25C, 28C	Rep(Temperature×Genotype)	257	166058	646.142	1.6	<0.0001
	Error	448	181418	404.952
v	v	v	v	v	v	v
Cka	Temperature	2	1038621	519310	595.47	<0.0001
Males Pooled	Genotype	1	6814.38	6814.38	7.81	0.0056
Across Temperature	Temperature×Genotype	2	8800.39	4400.2	5.05	0.0071
Temperature = 18C, 25C, 28C	Rep(Temperature×Genotype)	257	227674	885.892	1.75	<0.0001
	Error	429	217410	506.782
v	v	v	v	v	v	v
Cka	Sex	1	3487.91	3487.91	2.76	0.1004
Sex Pooled	Genotype	1	19168	19168	12.4	0.0007
Within Temperature	Sex×Genotype	1	16.4689	16.4689	0.01	0.9094
Temperature = 18C	Rep(Genotype)	86	134631	1565.48	1.23	0.1698
	Sex×Rep(Genotype)	84	107079	1274.75	1.75	0.0003
	Error	293	212985	726.91
v	v	v	v	v	v	v
Cka	Sex	1	1261.83	1261.83	1.86	0.1763
Sex Pooled	Genotype	1	1443.05	1443.05	2.22	0.14
Within Temperature	Sex×Genotype	1	8.84495	8.84495	0.01	0.9094
Temperature = 25C	Rep(Genotype)	89	58296	655.009	0.96	0.5719
	Sex×Rep(Genotype)	85	58011	682.486	1.5	0.0069
	Error	309	140504	454.707
v	v	v	v	v	v	v
Cka	Sex	1	852.669	852.669	4.41	0.0388
Sex Pooled	Genotype	1	299.393	299.393	1.51	0.2224
Within Temperature	Sex×Genotype	1	7372.68	7372.68	38.12	<0.0001
Temperature = 28C	Rep(Genotype)	91	18142	199.368	1.03	0.4498
	Sex×Rep(Genotype)	79	15324	193.97	1.18	0.1722
	Error	275	45339	164.869
v	v	v	v	v	v	v
Cka	Genotype	1	8020.73	8020.73	7.49	0.0075
Female	Rep(Genotype)	85	92709	1090.7	2.29	<0.0001
Temperature = 18C	Error	147	70093	476.821
v	v	v	v	v	v	v
Cka	Genotype	1	773.212	773.212	1.17	0.282
Female	Rep(Genotype)	88	58389	663.516	1.26	0.1037
Temperature = 25C	Error	163	85893	526.951
v	v	v	v	v	v	v
Cka	Genotype	1	2585.86	2585.86	14.5	0.0003
Female	Rep(Genotype)	84	14960	178.091	0.97	0.5629
Temperature = 28C	Error	138	25433	184.295
v	v	v	v	v	v	v
Cka	Genotype	1	9382.36	9382.36	5.38	0.0226
Male	Rep(Genotype)	85	150564	1771.35	1.81	0.0008
Temperature = 18C	Error	146	142892	978.711
v	v	v	v	v	v	v
Cka	Genotype	1	762.034	762.034	1.12	0.2924
Male	Rep(Genotype)	86	59365	690.292	1.85	0.0006
Temperature = 25C	Error	146	54611	374.05
v	v	v	v	v	v	v
Cka	Genotype	1	5323.05	5323.05	26.09	<0.0001
Male	Rep(Genotype)	86	17745	206.332	1.42	0.0334
Temperature = 28C	Error	137	19906	145.302
v	v	v	v	v	v	v

## Sheet: I. Doa
Analysis	Source of Variation	df	SS	MS	F-value	P-value
Doa	Sex	1	9518.74	9518.74	13.15	0.0003
Full Model	Temperature	2	2610156	1305078	1492.73	<0.0001
Pooled Across	Genotype	1	4459.93	4459.93	5.1	0.0247
Temperature & Sex	Sex×Temperature	2	14699	7349.44	10.15	<0.0001
Temperature = 18C, 25C, 28C	Sex×Genotype	1	202.124	202.124	0.28	0.5977
	Temperature×Genotype	2	22244	11122	12.72	<0.0001
	Sex×Temperature×Genotype	2	9031.13	4515.57	6.24	0.0023
	Rep(Temperature×Genotype)	265	234500	884.906	1.21	0.0604
	Sex×Rep(Temperature×Genotype)	252	184071	730.44	1.69	<0.0001
	Error	864	372697	431.362
Doa	Temperature	2	1164590	582295	856.38	<0.0001
Females Pooled	Genotype	1	1607.86	1607.86	2.37	0.1252
Across Temperature	Temperature×Genotype	2	1852.59	926.297	1.36	0.2578
Temperature = 18C, 25C, 28C	Rep(Temperature×Genotype)	260	179755	691.365	1.83	<0.0001
	Error	441	166610	377.801
Doa	Temperature	2	1476720	738360	809.76	<0.0001
Males Pooled	Genotype	1	3076.21	3076.21	3.37	0.0673
Across Temperature	Temperature×Genotype	2	29066	14533	15.94	<0.0001
Temperature = 18C, 25C, 28C	Rep(Temperature×Genotype)	257	238514	928.07	1.9	<0.0001
	Error	423	206087	487.203
Doa	Sex	1	19305	19305	15.84	0.0001
Sex Pooled	Genotype	1	17094	17094	9.91	0.0023
Within Temperature	Sex×Genotype	1	5876.85	5876.85	4.82	0.0308
Temperature = 18C	Rep(Genotype)	85	148682	1749.2	1.42	0.0551
	Sex×Rep(Genotype)	84	103476	1231.86	1.85	<0.0001
	Error	285	189521	664.985
Doa	Sex	1	963.765	963.765	1.34	0.2506
Sex Pooled	Genotype	1	4054.56	4054.56	5.56	0.0205
Within Temperature	Sex×Genotype	1	50.6144	50.6144	0.07	0.7916
Temperature = 25C	Rep(Genotype)	89	65405	734.888	1.01	0.4767
	Sex×Rep(Genotype)	86	62389	725.451	1.62	0.0017
	Error	301	135142	448.978
Doa	Sex	1	3492	3492	15.8	0.0001
Sex Pooled	Genotype	1	5874.2	5874.2	26.34	<0.0001
Within Temperature	Sex×Genotype	1	3349.63	3349.63	15.16	0.0002
Temperature = 28C	Rep(Genotype)	91	20413	224.318	1.01	0.4771
	Sex×Rep(Genotype)	82	18206	222.025	1.28	0.0705
	Error	278	48034	172.784
Doa	Genotype	1	1500.11	1500.11	1.33	0.2518
Female	Rep(Genotype)	85	98220	1155.53	2.56	<0.0001
Temperature = 18C	Error	139	62723	451.247
Doa	Genotype	1	1909.12	1909.12	2.84	0.0956
Female	Rep(Genotype)	88	59738	678.843	1.47	0.0181
Temperature = 25C	Error	162	74962	462.726
Doa	Genotype	1	143.443	143.443	0.58	0.4496
Female	Rep(Genotype)	87	21797	250.536	1.21	0.1543
Temperature = 28C	Error	140	28925	206.61
Doa	Genotype	1	21040	21040	11.81	0.0009
Male	Rep(Genotype)	84	152426	1814.6	2.09	<0.0001
Temperature = 18C	Error	146	126798	868.476
Doa	Genotype	1	2266.81	2266.81	2.87	0.0936
Male	Rep(Genotype)	87	69938	803.887	1.86	0.0006
Temperature = 25C	Error	139	60181	432.956
Doa	Genotype	1	9032.95	9032.95	48.58	<0.0001
Male	Rep(Genotype)	86	16150	187.787	1.36	0.0553
Temperature = 28C	Error	138	19109	138.467

## Sheet: J. E23
Analysis	Source of Variation	df	SS	MS	F-value	P-value
E23	Sex	1	2492.08	2492.08	3.65	0.0573
Full Model	Temperature	2	1739565	869783	1088.63	<0.0001
Pooled Across	Genotype	1	2366.81	2366.81	2.96	0.0863
Temperature & Sex	Sex×Temperature	2	4774.86	2387.43	3.49	0.0319
Temperature = 18C, 25C, 28C	Sex×Genotype	1	1096.39	1096.39	1.6	0.2065
	Temperature×Genotype	2	47126	23563	29.49	<0.0001
	Sex×Temperature×Genotype	2	1804	902.001	1.32	0.2691
	Rep(Temperature×Genotype)	265	214355	808.885	1.18	0.0963
	Sex×Rep(Temperature×Genotype)	248	170964	689.37	1.66	<0.0001
	Error	862	357638	414.893
E23	Temperature	2	872915	436458	645.26	<0.0001
Females Pooled	Genotype	1	71.644	71.644	0.11	0.7451
Across Temperature	Temperature×Genotype	2	19109	9554.73	14.13	<0.0001
Temperature = 18C, 25C, 28C	Rep(Temperature×Genotype)	256	175580	685.859	1.62	<0.0001
	Error	431	182128	422.571
E23	Temperature	2	889525	444763	562.27	<0.0001
Males Pooled	Genotype	1	3192.58	3192.58	4.04	0.0455
Across Temperature	Temperature×Genotype	2	30205	15103	19.09	<0.0001
Temperature = 18C, 25C, 28C	Rep(Temperature×Genotype)	257	206977	805.356	1.98	<0.0001
	Error	431	175510	407.215
E23	Sex	1	1348.61	1348.61	1.05	0.3087
Sex Pooled	Genotype	1	33656	33656	20.73	<0.0001
Within Temperature	Sex×Genotype	1	696.863	696.863	0.54	0.4637
Temperature = 18C	Rep(Genotype)	86	141643	1647.01	1.27	0.1388
	Sex×Rep(Genotype)	86	111969	1301.96	1.95	<0.0001
	Error	288	192226	667.452
E23	Sex	1	570.017	570.017	1.08	0.3017
Sex Pooled	Genotype	1	15164	15164	23.87	<0.0001
Within Temperature	Sex×Genotype	1	196.751	196.751	0.37	0.5432
Temperature = 25C	Rep(Genotype)	87	55649	639.643	1.21	0.1942
	Sex×Rep(Genotype)	84	44536	530.188	1.26	0.0807
	Error	298	124998	419.457
E23	Sex	1	5090.23	5090.23	27.56	<0.0001
Sex Pooled	Genotype	1	505.382	505.382	2.74	0.1009
Within Temperature	Sex×Genotype	1	1906.22	1906.22	10.32	0.0019
Temperature = 28C	Rep(Genotype)	92	17063	185.466	1	0.4929
	Sex×Rep(Genotype)	78	14459	185.377	1.27	0.0869
	Error	276	40413	146.426
E23	Genotype	1	12158	12158	9.42	0.0028
Female	Rep(Genotype)	86	113502	1319.79	2.23	<0.0001
Temperature = 18C	Error	141	83396	591.462
E23	Genotype	1	6732.84	6732.84	13.05	0.0005
Female	Rep(Genotype)	85	43936	516.899	1.06	0.3716
Temperature = 25C	Error	153	74544	487.217
E23	Genotype	1	252.103	252.103	1.19	0.2785
Female	Rep(Genotype)	85	18142	213.433	1.21	0.1608
Temperature = 28C	Error	137	24188	176.552
E23	Genotype	1	22342	22342	14.25	0.0003
Male	Rep(Genotype)	86	137517	1599.03	2.16	<0.0001
Temperature = 18C	Error	147	108830	740.34
E23	Genotype	1	9129.76	9129.76	14.06	0.0003
Male	Rep(Genotype)	86	56795	660.405	1.9	0.0003
Temperature = 25C	Error	145	50454	347.959
E23	Genotype	1	1942.75	1942.75	13.14	0.0005
Male	Rep(Genotype)	85	12665	149.002	1.28	0.1008
Temperature = 28C	Error	139	16226	116.733

[truncated: 7 more sheets: K. Eip75B, L. olf413, M. PGRP-LA, N. PGRP-LC, O. Rdl, P. tou, Q. P-Value Summary]
